# Supplementary material
Source: publisher figshare collection journal article supplement (https://acs.figshare.com/ndownloader/files/3887386)
Supplement: Supplementary file 1 [file 3887386]

C	4.842759546	1.228648373	3.96232805
C	6.085549283	0.481904961	3.96232805
C	5.759397249	-0.930814726	3.96232805
C	4.315034461	-1.057180096	3.96232805
C	3.74852121	0.277441499	3.96232805
C	7.168810565	0.941722096	3.2162988
C	7.96183194	0.015669764	2.43857472
C	7.65017299	-1.334273485	2.43857472
C	6.531455479	-1.818966122	3.2162988
C	5.895784451	-2.85934017	2.43857472
C	4.515604216	-2.980090294	2.43857472
C	3.708931402	-2.065904981	3.2162988
C	2.523043731	-1.782839171	2.43857472
C	1.981704395	-0.507523602	2.43857472
C	2.601870693	0.54216663	3.2162988
C	2.504622824	1.757484963	2.43857472
C	3.550236952	2.666423454	2.43857472
C	4.740193611	2.400982377	3.2162988
C	5.865978794	2.869024613	2.43857472
C	7.053543207	2.155463928	2.43857472
C	3.941760906	3.31233927	1.20439728
C	5.368240865	3.437140095	1.20439728
C	8.348332384	0.664604008	1.20439728
C	7.788833207	1.982701481	1.20439728
C	1.810503416	1.459665397	1.20439728
C	1.488389512	0.064436774	1.20439728
C	2.59179228	-2.535017265	1.20439728
C	3.819194894	-3.272515161	1.20439728
C	6.632392795	-3.026392236	1.20439728
C	7.713083241	-2.086962364	1.20439728
C	8.175771273	-1.498213377	0
C	8.506103068	-0.067389166	0
C	7.371878104	2.604677395	0
C	6.113161559	3.3609906	0
C	3.221380453	3.107992536	0
C	2.113119049	2.144595594	0
C	2.03389833	-2.035557632	0
C	1.460125	-0.68383237	0
C	5.984979744	-3.402639396	0
C	4.52210692	-3.530624184	0
C	7.713083241	-2.086962364	-1.20439728
C	6.632392795	-3.026392236	-1.20439728
C	7.788833207	1.982701481	-1.20439728
C	8.348332384	0.664604008	-1.20439728
C	5.368240865	3.437140095	-1.20439728
C	3.941760906	3.31233927	-1.20439728
C	3.819194894	-3.272515161	-1.20439728
C	2.59179228	-2.535017265	-1.20439728
C	1.488389512	0.064436774	-1.20439728
C	1.810503416	1.459665397	-1.20439728
C	2.504622824	1.757484963	-2.43857472
C	3.550236952	2.666423454	-2.43857472
C	5.865978794	2.869024613	-2.43857472
C	7.053543207	2.155463928	-2.43857472
C	7.96183194	0.015669764	-2.43857472
C	7.65017299	-1.334273485	-2.43857472
C	5.895784451	-2.85934017	-2.43857472
C	4.515604216	-2.980090294	-2.43857472
C	1.981704395	-0.507523602	-2.43857472
C	2.523043731	-1.782839171	-2.43857472
C	6.531455479	-1.818966122	-3.2162988
C	3.708931402	-2.065904981	-3.2162988
C	2.601870693	0.54216663	-3.2162988
C	4.740193611	2.400982377	-3.2162988
C	7.168810565	0.941722096	-3.2162988
C	4.842759546	1.228648373	-3.96232805
C	6.085549283	0.481904961	-3.96232805
C	5.759397249	-0.930814726	-3.96232805
C	3.74852121	0.277441499	-3.96232805
C	4.315034461	-1.057180096	-3.96232805
C	-4.842759546	1.228648373	3.96232805
C	-6.085549283	0.481904961	3.96232805
C	-5.759397249	-0.930814726	3.96232805
C	-4.315034461	-1.057180096	3.96232805
C	-3.74852121	0.277441499	3.96232805
C	-7.168810565	0.941722096	3.2162988
C	-7.96183194	0.015669764	2.43857472
C	-7.65017299	-1.334273485	2.43857472
C	-6.531455479	-1.818966122	3.2162988
C	-5.895784451	-2.85934017	2.43857472
C	-4.515604216	-2.980090294	2.43857472
C	-3.708931402	-2.065904981	3.2162988
C	-2.523043731	-1.782839171	2.43857472
C	-1.981704395	-0.507523602	2.43857472
C	-2.601870693	0.54216663	3.2162988
C	-2.504622824	1.757484963	2.43857472
C	-3.550236952	2.666423454	2.43857472
C	-4.740193611	2.400982377	3.2162988
C	-5.865978794	2.869024613	2.43857472
C	-7.053543207	2.155463928	2.43857472
C	-3.941760906	3.31233927	1.20439728
C	-5.368240865	3.437140095	1.20439728
C	-8.348332384	0.664604008	1.20439728
C	-7.788833207	1.982701481	1.20439728
C	-1.810503416	1.459665397	1.20439728
C	-1.488389512	0.064436774	1.20439728
C	-2.59179228	-2.535017265	1.20439728
C	-3.819194894	-3.272515161	1.20439728
C	-6.632392795	-3.026392236	1.20439728
C	-7.713083241	-2.086962364	1.20439728
C	-8.175771273	-1.498213377	0
C	-8.506103068	-0.067389166	0
C	-7.371878104	2.604677395	0
C	-6.113161559	3.3609906	0
C	-3.221380453	3.107992536	0
C	-2.113119049	2.144595594	0
C	-2.03389833	-2.035557632	0
C	-1.460125	-0.68383237	0
C	-5.984979744	-3.402639396	0
C	-4.52210692	-3.530624184	0
C	-7.713083241	-2.086962364	-1.20439728
C	-6.632392795	-3.026392236	-1.20439728
C	-7.788833207	1.982701481	-1.20439728
C	-8.348332384	0.664604008	-1.20439728
C	-5.368240865	3.437140095	-1.20439728
C	-3.941760906	3.31233927	-1.20439728
C	-3.819194894	-3.272515161	-1.20439728
C	-2.59179228	-2.535017265	-1.20439728
C	-1.488389512	0.064436774	-1.20439728
C	-1.810503416	1.459665397	-1.20439728
C	-2.504622824	1.757484963	-2.43857472
C	-3.550236952	2.666423454	-2.43857472
C	-5.865978794	2.869024613	-2.43857472
C	-7.053543207	2.155463928	-2.43857472
C	-7.96183194	0.015669764	-2.43857472
C	-7.65017299	-1.334273485	-2.43857472
C	-5.895784451	-2.85934017	-2.43857472
C	-4.515604216	-2.980090294	-2.43857472
C	-1.981704395	-0.507523602	-2.43857472
C	-2.523043731	-1.782839171	-2.43857472
C	-6.531455479	-1.818966122	-3.2162988
C	-3.708931402	-2.065904981	-3.2162988
C	-2.601870693	0.54216663	-3.2162988
C	-4.740193611	2.400982377	-3.2162988
C	-7.168810565	0.941722096	-3.2162988
C	-4.842759546	1.228648373	-3.96232805
C	-6.085549283	0.481904961	-3.96232805
C	-5.759397249	-0.930814726	-3.96232805
C	-3.74852121	0.277441499	-3.96232805
C	-4.315034461	-1.057180096	-3.96232805
